# Supplementary material for: Biogeochemistry of an Amazonian podzol-ferralsol soil system with white kaolin
Source: Copernicus journal article supplement (doi:10.5194/bg-9-3705-2012), 2012-09-28
Supplement: Supplementary file 1 [file bg-9-3705-2012-supplement.pdf]

**Supplementary material to:**

**Biogeochemistry of an Amazonian Podzol-Ferralsol Soil System with White Kaolin**

Y. Lucas, C. R. Montes, S. Mounier, M. Loustau Cazalet, D. Ishida, R. Achard, C. Garnier, B. Coulomb, and A. J. Melfi

**Content:**

Table S1. Composition of the groundwater from each sample and for each sampling day.

Fig. S1. pH variation with adjustment of ionic strength  $I$  expressed in  $\text{eq.L}^{-1}$ .  $\Delta\text{pH}$  is the difference between pH measured before adjustment and pH measured at  $I = 0.01$ .

Fig. S2. Average composition of the sampled waters along the pathway n°1 for each sampling period. Vertical bars give the calculated standard deviation for each set of data.

Fig. S3. Average composition of the sampled waters along the pathway n°2 for each sampling period. Vertical bars give the calculated standard deviation for each set of data. The first sampling period is not given here because the Ef horizon lacked free water at this period.

Table S1. Composition of the groundwater from each sample and for each sampling d

| Sample name              | Si<br>(mg L <sup>-1</sup> ) | Al <sup>3+</sup><br>(mg L <sup>-1</sup> ) | Fe <sup>2+</sup><br>(mg L <sup>-1</sup> ) | Fe <sup>3+</sup><br>(mg L <sup>-1</sup> ) | pH  | Eh<br>(mV) | DOC<br>(mg L <sup>-1</sup> ) | Si<br>(mg L <sup>-1</sup> ) | Al <sup>3+</sup><br>(mg L <sup>-1</sup> ) | Fe <sup>2+</sup><br>(mg L <sup>-1</sup> ) | Fe <sup>3+</sup><br>(mg L <sup>-1</sup> ) | pH  | Eh<br>(mV) | DOC<br>(mg L <sup>-1</sup> ) |
|--------------------------|-----------------------------|-------------------------------------------|-------------------------------------------|-------------------------------------------|-----|------------|------------------------------|-----------------------------|-------------------------------------------|-------------------------------------------|-------------------------------------------|-----|------------|------------------------------|
| <i>27/07/07 sampling</i> |                             |                                           |                                           |                                           |     |            |                              | <i>28/07/07 sampling</i>    |                                           |                                           |                                           |     |            |                              |
| Spring                   | nd                          | nd                                        | nd                                        | nd                                        | 3,4 | nd         | nd                           | 0,05                        | 0,02                                      | i                                         | i                                         | 3,7 | nd         | 38,5                         |
| W1-20                    | a                           | a                                         | a                                         | a                                         | a   | a          | a                            | 0,00                        | 0,14                                      | 0,13                                      | 0,07                                      | 3,8 | nd         | nd                           |
| W2-150                   | 0,27                        | 0,21                                      | 0,09                                      | 0,15                                      | 3,6 | nd         | 36,5                         | a                           | a                                         | a                                         | a                                         | a   | a          | a                            |
| S1-240                   | 0,56                        | 0,48                                      | 0,19                                      | 0,09                                      | 3,9 | nd         | 16,0                         | 0,52                        | 0,44                                      | 0,10                                      | 0,11                                      | 3,9 | nd         | 13,8                         |
| S1-510                   | 0,11                        | 0,34                                      | 0,09                                      | 0,00                                      | 3,9 | nd         | nd                           | 0,13                        | 0,39                                      | 0,07                                      | 0,02                                      | 4,3 | nd         | 1,7                          |
| SCB-15                   | 2,44                        | 0,73                                      | nd                                        | nd                                        | 4,2 | nd         | nd                           | 2,44                        | 0,63                                      | 2,07                                      | 0,59                                      | 4,3 | nd         | nd                           |
| S2-160                   | a                           | a                                         | a                                         | a                                         | a   | a          | a                            | a                           | a                                         | a                                         | a                                         | a   | a          | a                            |
| S2-490                   | 0,11                        | 0,12                                      | 0,03                                      | 0,04                                      | 4,0 | nd         | 1,8                          | 0,11                        | 0,14                                      | 0,05                                      | 0,02                                      | 4,4 | nd         | 2,5                          |
| S3-160                   | a                           | a                                         | a                                         | a                                         | a   | a          | a                            | a                           | a                                         | a                                         | a                                         | a   | a          | a                            |
| S3-380                   | 0,19                        | 0,01                                      | <ql                                       | <ql                                       | 4,9 | nd         | nd                           | a                           | a                                         | a                                         | a                                         | a   | a          | a                            |
| S4-400                   | 0,61                        | 0,01                                      | <ql                                       | <ql                                       | 4,2 | nd         | 9,4                          | 0,66                        | <ql                                       | 0,07                                      | 0,05                                      | 4,9 | nd         | 2,8                          |
| S5-380                   | 0,64                        | 0,01                                      | a                                         | a                                         | 4,3 | nd         | nd                           | 0,67                        | <ql                                       | 0,09                                      | 0,05                                      | 5,0 | nd         | nd                           |
| S6-80                    | a                           | a                                         | a                                         | a                                         | a   | a          | a                            | a                           | a                                         | a                                         | a                                         | a   | a          | a                            |
| S6-300                   | 0,55                        | 0,09                                      | 0,92                                      | 0,03                                      | 4,6 | nd         | nd                           | 0,57                        | 0,10                                      | 1,11                                      | 0,04                                      | 5,0 | nd         | 3,8                          |
| <i>29/07/07 sampling</i> |                             |                                           |                                           |                                           |     |            |                              | <i>30/07/2007</i>           |                                           |                                           |                                           |     |            |                              |
| Spring                   | 0,02                        | 0,02                                      | <ql                                       | <ql                                       | 3,8 | nd         | 39,0                         | 0,07                        | 0,02                                      | i                                         | i                                         | 3,6 | nd         | 38,6                         |
| W1-20                    | a                           | a                                         | a                                         | a                                         | a   | a          | a                            | 0,05                        | 0,02                                      | 0,06                                      | 0,04                                      | 3,6 | nd         | 55,2                         |
| W2-150                   | a                           | a                                         | a                                         | a                                         | a   | a          | a                            | a                           | a                                         | a                                         | a                                         | a   | a          | a                            |
| S1-240                   | 0,51                        | 0,41                                      | 0,16                                      | 0,07                                      | 3,8 | nd         | 12,8                         | 0,51                        | 0,44                                      | 0,13                                      | 0,15                                      | 3,5 | nd         | 15,2                         |
| S1-510                   | 0,12                        | 0,35                                      | 0,07                                      | 0,01                                      | 4,1 | nd         | 1,5                          | 0,12                        | 0,41                                      | 0,06                                      | 0,03                                      | 3,8 | nd         | 1,5                          |
| SCB-15                   | 2,44                        | 0,57                                      | 0,42                                      | 0,65                                      | 4,1 | nd         | nd                           | 1,19                        | 0,61                                      | 0,86                                      | 0,56                                      | 4,0 | nd         | nd                           |
| S2-160                   | a                           | a                                         | a                                         | a                                         | a   | a          | a                            | a                           | a                                         | a                                         | a                                         | a   | a          | a                            |
| S2-490                   | 0,11                        | 0,13                                      | <ql                                       | <ql                                       | 3,9 | nd         | 1,9                          | 0,11                        | 0,15                                      | 0,07                                      | 0,03                                      | 4,0 | nd         | 4,0                          |
| S3-160                   | a                           | a                                         | a                                         | a                                         | a   | a          | a                            | a                           | a                                         | a                                         | a                                         | a   | a          | a                            |
| S3-380                   | a                           | a                                         | a                                         | a                                         | a   | a          | a                            | a                           | a                                         | a                                         | a                                         | a   | a          | a                            |
| S4-400                   | 0,65                        | 0,01                                      | 0,05                                      | 0,06                                      | 4,2 | nd         | 2,6                          | 0,71                        | 0,01                                      | 0,07                                      | 0,01                                      | 4,1 | nd         | 4,0                          |
| S5-380                   | 0,65                        | <ql                                       | <ql                                       | <ql                                       | 4,3 | nd         | nd                           | 0,69                        | <ql                                       | 0,07                                      | 0,03                                      | 4,4 | nd         | nd                           |
| S6-80                    | a                           | a                                         | a                                         | a                                         | a   | a          | a                            | 0,28                        | 0,62                                      | 0,48                                      | 0,11                                      | 4,1 | nd         | 15,7                         |
| S6-300                   | 0,56                        | 0,08                                      | 0,99                                      | 0,06                                      | 4,5 | nd         | 3,8                          | 0,55                        | 0,10                                      | 1,01                                      | 0,06                                      | 4,4 | nd         | 3,7                          |
| <i>29/01/08 sampling</i> |                             |                                           |                                           |                                           |     |            |                              | <i>31/01/08 sampling</i>    |                                           |                                           |                                           |     |            |                              |
| Spring                   | 0,04                        | <ql                                       | <ql                                       | 0,05                                      | 4,2 | 527        | 37,3                         | 0,06                        | 0,03                                      | 0,10                                      | <ql                                       | 4,3 | 515        | 43,0                         |
| W1-20                    | 0,10                        | 0,01                                      | 0,07                                      | <ql                                       | 4,4 | 490        | 28,9                         | <ql                         | <ql                                       | <ql                                       | <ql                                       | 4,5 | 472        | 35,6                         |
| W2-150                   | 0,23                        | 0,14                                      | <ql                                       | 0,06                                      | 4,4 | 510        | 35,1                         | 0,24                        | 0,15                                      | 0,05                                      | 0,02                                      | 4,3 | 499        | 37,3                         |
| S1-240                   | 0,47                        | 0,63                                      | <ql                                       | 0,06                                      | 4,3 | 545        | 14,6                         | 0,40                        | 0,62                                      | <ql                                       | 0,08                                      | 4,2 | 496        | 18,9                         |
| S1-510                   | 0,12                        | 0,41                                      | <ql                                       | <ql                                       | 5,0 | 522        | nd                           | 0,20                        | 0,40                                      | <ql                                       | <ql                                       | 5,0 | 491        | nd                           |
| SCB-15                   | 1,68                        | 0,76                                      | 2,17                                      | 0,91                                      | 5,0 | 325        | nd                           | 1,89                        | 0,67                                      | 2,52                                      | 0,39                                      | 5,0 | 343        | 31,2                         |
| S2-160                   | a                           | a                                         | a                                         | a                                         | a   | a          | a                            | 0,42                        | 0,17                                      | 0,11                                      | 0,06                                      | 5,1 | 484        | 7,3                          |
| S2-490                   | 0,17                        | 0,12                                      | 0,09                                      | 0,02                                      | 5,0 | 520        | nd                           | 0,19                        | 0,17                                      | nd                                        | nd                                        | 5,1 | 499        | 5,8                          |
| S3-160                   | 0,28                        | 0,06                                      | 0,15                                      | 0,00                                      | 5,1 | 477        | nd                           | 0,28                        | 0,06                                      | 0,07                                      | 0,00                                      | 5,2 | 519        | 4,5                          |
| S3-380                   | 0,19                        | 0,06                                      | 0,06                                      | 0,02                                      | 5,1 | 512        | nd                           | 0,17                        | 0,07                                      | 0,06                                      | 0,05                                      | 5,1 | 492        | 5,8                          |
| S4-400                   | 0,45                        | 0,03                                      | 0,07                                      | 0,02                                      | 5,2 | 500        | nd                           | 0,27                        | 0,06                                      | <ql                                       | <ql                                       | 5,2 | 520        | 5,6                          |
| S5-380                   | 0,53                        | <ql                                       | 0,15                                      | 0,07                                      | 5,3 | 453        | nd                           | 0,42                        | <ql                                       | <ql                                       | <ql                                       | 5,3 | 464        | nd                           |
| S6-80                    | 0,00                        | 0,50                                      | i                                         | i                                         | 5,1 | 495        | nd                           | 0,23                        | 0,62                                      | 0,04                                      | 0,01                                      | 4,8 | 510        | 19,0                         |
| S6-300                   | 0,52                        | 0,11                                      | 0,56                                      | 0,13                                      | 5,4 | 191        | nd                           | 0,46                        | 0,09                                      | 0,58                                      | 0,05                                      | 5,5 | 185        | 9,7                          |

| 02/02/08 sampling |      |      |      |       |     |     |      | 04/02/08 sampling |      |      |       |     |     |      |  |
|-------------------|------|------|------|-------|-----|-----|------|-------------------|------|------|-------|-----|-----|------|--|
| Spring            | 0,06 | <ql  | 0,04 | 0,00  | 4,3 | 514 | 42,6 | 0,05              | <ql  | i    | i     | 4,3 | 508 | 45,4 |  |
| W1-20             | 0,09 | 0,02 | 0,03 | 0,02  | 4,4 | 467 | 35,6 | a                 | a    | a    | a     | a   | a   | a    |  |
| W2-150            | 0,20 | 0,15 | 0,03 | 0,00  | 4,3 | 498 | 40,5 | 0,19              | 0,18 | 0,03 | 0,03  | 4,5 | 472 | 35,1 |  |
| S1-240            | 0,57 | 0,55 | 0,07 | 0,05  | 4,3 | 498 | 15,6 | 0,59              | 0,60 | 0,07 | 0,04  | 4,4 | 462 | 17,1 |  |
| S1-510            | 0,14 | 0,39 | <ql  | <ql   | 5,0 | 508 | nd   | 0,16              | 0,40 | 0,20 | 0,03  | 5,1 | 493 | nd   |  |
| SCB-15            | 2,15 | 0,63 | 2,20 | 0,47  | 5,0 | 345 | 28,3 | 2,19              | nd   | nd   | nd    | 5,0 | 392 | 27,2 |  |
| S2-160            | a    | a    | a    | a     | a   | a   | a    | a                 | a    | a    | a     | a   | a   | a    |  |
| S2-490            | 0,20 | 0,17 | <ql  | <ql   | 5,1 | 498 | 5,3  | 0,20              | 0,18 | 0,05 | 0,02  | 5,1 | 497 | 2,8  |  |
| S3-160            | 0,40 | 0,05 | <ql  | <ql   | 5,2 | 462 | 4,5  | a                 | a    | a    | a     | a   | a   | a    |  |
| S3-380            | 0,23 | 0,07 | <ql  | <ql   | 5,2 | 476 | 5,0  | 0,24              | 0,08 | <ql  | <ql   | 5,2 | 467 | 2,2  |  |
| S4-400            | 0,37 | 0,04 | <ql  | <ql   | 5,2 | 492 | 7,3  | 0,48              | <ql  | <ql  | <ql   | 5,3 | 488 | 5,6  |  |
| S5-380            | 0,44 | <ql  | 0,12 | 0,03  | 5,3 | 449 | nd   | 0,64              | <ql  | <ql  | <ql   | 5,4 | 437 | nd   |  |
| S6-80             | a    | a    | a    | a     | a   | a   | a    | a                 | a    | a    | a     | a   | a   | a    |  |
| S6-300            | 0,36 | 0,08 | 0,58 | 0,05  | 5,5 | 183 | 9,3  | 0,54              | nd   | nd   | nd    | 5,5 | 172 | nd   |  |
| 19/05/08 sampling |      |      |      |       |     |     |      | 21/05/08 sampling |      |      |       |     |     |      |  |
| Spring            | 0,02 | <ql  | 0,03 | -0,01 | 4,2 | nd  | 29,0 | 0,04              | 0,05 | 0,01 | 0,00  | 4,2 | 538 | 32,1 |  |
| W1-20             | 0,02 | 0,03 | i    | i     | 4,2 | nd  | 24,2 | 0,05              | 0,02 | i    | i     | 4,4 | 495 | 27,6 |  |
| W2-150            | 0,22 | 0,16 | 0,38 | 0,00  | 3,9 | nd  | 52,4 | 0,48              | 0,24 | 0,06 | -0,01 | 4,0 | 563 | 43,0 |  |
| S1-240            | 0,29 | 0,46 | 0,18 | 0,00  | 4,1 | nd  | 12,4 | 0,49              | 0,41 | 0,08 | 0,00  | 4,2 | 567 | 13,8 |  |
| S1-510            | 0,10 | 0,33 | 0,10 | 0,00  | 4,6 | nd  | nd   | 0,12              | 0,33 | 0,09 | 0,00  | 4,7 | 575 | 2,8  |  |
| SCB-15            | 1,31 | 0,70 | 1,05 | 1,65  | 4,6 | nd  | 37,8 | 1,52              | 0,81 | 1,74 | 0,80  | 4,6 | 405 | 35,4 |  |
| S2-160            | 0,31 | 0,20 | <ql  | <ql   | 4,7 | nd  | 8,5  | 0,54              | 0,17 | <ql  | <ql   | 4,7 | 409 | 7,6  |  |
| S2-490            | 0,17 | 0,14 | <ql  | <ql   | 4,9 | nd  | 5,5  | 0,31              | 0,07 | nd   | nd    | 4,8 | 543 | 3,3  |  |
| S3-160            | 0,21 | 0,04 | <ql  | <ql   | 4,9 | nd  | 5,0  | 0,29              | 0,06 | <ql  | <ql   | 4,8 | 498 | 10,2 |  |
| S3-380            | 0,12 | 0,08 | <ql  | <ql   | 4,8 | nd  | 3,2  | 0,18              | <ql  | <ql  | <ql   | 4,8 | 532 | 6,0  |  |
| S4-400            | 0,25 | 0,04 | <ql  | <ql   | 4,9 | nd  | 5,7  | 0,54              | <ql  | <ql  | <ql   | 4,9 | 487 | 6,0  |  |
| S5-380            | 0,38 | 0,01 | 0,09 | 0,03  | 5,0 | nd  | 1,5  | 0,49              | <ql  | 0,05 | 0,02  | 4,9 | 466 | 4,5  |  |
| S6-80             | 0,15 | 0,65 | 0,06 | 0,04  | 4,7 | nd  | 16,5 | 0,26              | 0,76 | nd   | nd    | 4,4 | 410 | 16,2 |  |
| S6-300            | 0,34 | 0,11 | 0,55 | 0,07  | 5,2 | nd  | 5,0  | 0,53              | 0,08 | 0,53 | 0,04  | 5,1 | 147 | 5,7  |  |
| 23/05/08 sampling |      |      |      |       |     |     |      | 25/05/08 sampling |      |      |       |     |     |      |  |
| Spring            | 0,05 | 0,01 | i    | i     | 4,2 | 503 | 32,8 | 0,06              | nd   | <ql  | <ql   | 4,0 | 542 | 33,3 |  |
| W1-20             | 0,05 | 0,02 | i    | i     | 4,2 | 460 | 27,8 | 0,04              | nd   | nd   | nd    | 4,1 | 451 | 27,4 |  |
| W2-150            | 0,31 | 0,19 | i    | i     | 4,0 | 520 | 34,5 | 0,30              | 0,18 | nd   | nd    | 4,0 | 521 | 41,2 |  |
| S1-240            | 0,40 | 0,39 | 0,05 | 0,06  | 4,0 | 410 | 12,8 | 0,43              | 0,37 | nd   | nd    | 4,1 | 527 | 13,9 |  |
| S1-510            | 0,12 | 0,35 | <ql  | <ql   | 4,6 | 468 | 3,5  | 0,12              | 0,39 | nd   | nd    | 4,6 | 540 | 2,8  |  |
| SCB-15            | 1,45 | 0,70 | 1,19 | 1,05  | 4,4 | 377 | 31,6 | 1,62              | nd   | nd   | nd    | 4,5 | 415 | 34,6 |  |
| S2-160            | 0,57 | 0,17 | 0,63 | 0,08  | 4,6 | 296 | 6,1  | 0,45              | 0,27 | 0,10 | 0,04  | 3,8 | 406 | 7,8  |  |
| S2-490            | 0,40 | 0,09 | <ql  | <ql   | 4,6 | 444 | 7,0  | 0,41              | 0,18 | i    | i     | 4,6 | 495 | 4,3  |  |
| S3-160            | 0,30 | 0,09 | <ql  | <ql   | 4,7 | 448 | 4,6  | 0,33              | nd   | nd   | nd    | 4,7 | 489 | 3,8  |  |
| S3-380            | 0,20 | 0,14 | <ql  | <ql   | 4,6 | 478 | 4,0  | 0,21              | nd   | nd   | nd    | 4,6 | 498 | 3,7  |  |
| S4-400            | 0,45 | 0,05 | <ql  | 0,46  | 4,9 | 490 | 1,9  | 0,42              | 0,07 | nd   | nd    | 4,8 | 482 | 2,7  |  |
| S5-380            | 0,52 | <ql  | <ql  | <ql   | 4,6 | 470 | 3,9  | 0,54              | <ql  | <ql  | <ql   | 4,8 | 478 | 3,7  |  |
| S6-80             | 0,25 | 0,66 | <ql  | 0,09  | 4,4 | 502 | 15,6 | 0,56              | nd   | nd   | nd    | 4,4 | 365 | 13,3 |  |
| S6-300            | 0,53 | 0,09 | 0,52 | 0,09  | 4,8 | 163 | 3,5  | 0,24              | nd   | nd   | nd    | 4,9 | 164 | 4,6  |  |

a Sampler in the vadose zone at sampling time

i No available result because of interference with DOC

nd No data

<ql Below quantification limit

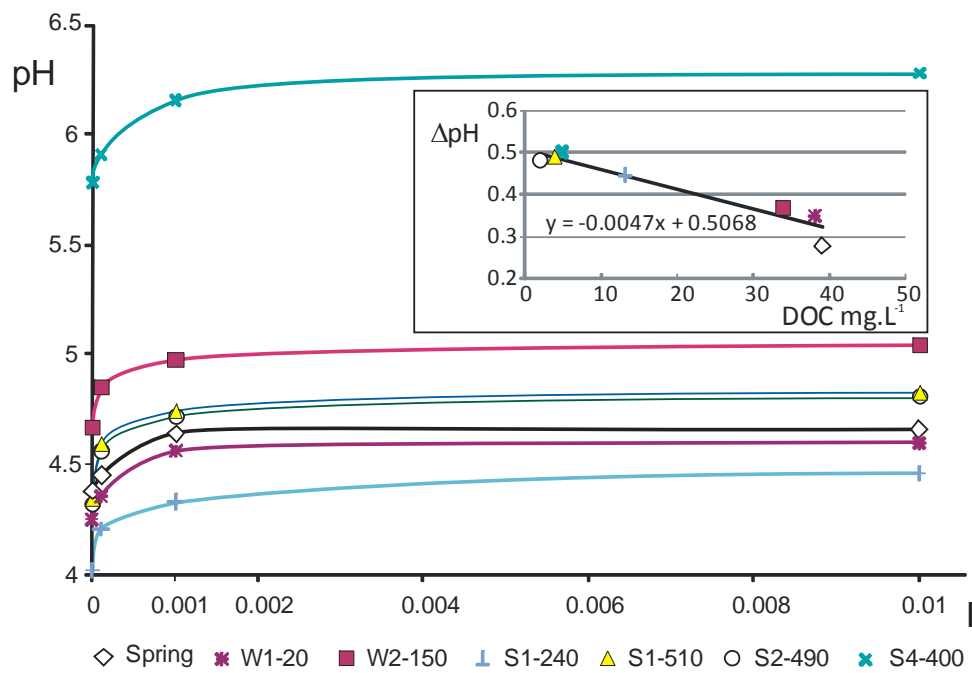

Fig. S1. pH variation with adjustment of ionic strength  $I$  expressed in  $\text{eq.L}^{-1}$ .  $\Delta\text{pH}$  is the difference between pH measured before adjustment and pH measured at  $I = 0.01$ .

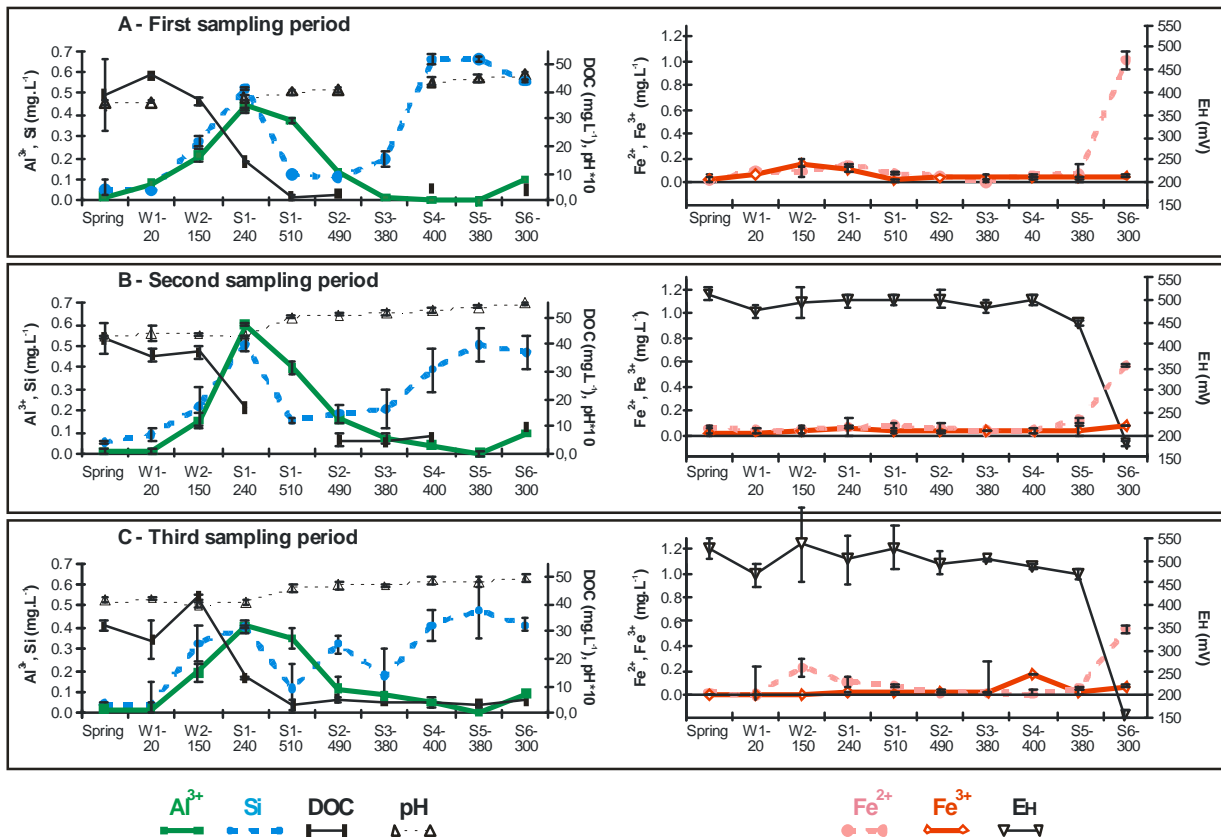

Fig. S2. Average composition of the sampled waters along the pathway n°1 for each sampling period. Vertical bars give the calculated standard deviation for each set of data.

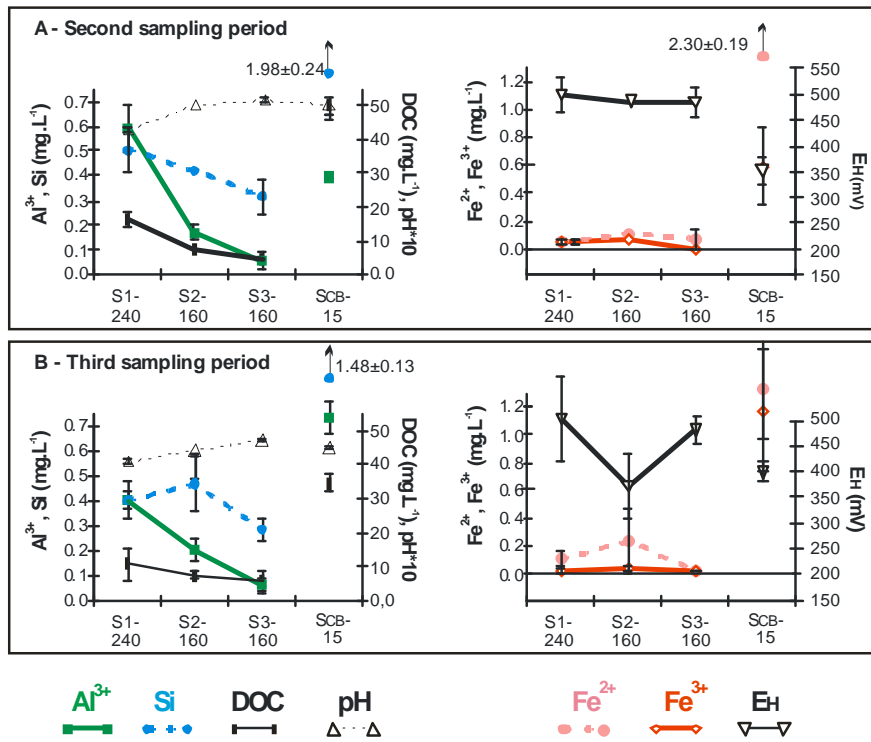

Fig. S3. Average composition of the sampled waters along the pathway n°2 for each sampling period. Vertical bars give the calculated standard deviation for each set of data. The first sampling period is not given here because the Ef horizon lacked free water at this period.
